1

## 2 **Oculomotor inhibition precedes temporally expected auditory targets**

3 Dekel Abeles<sup>[1]\*</sup>, Roy Amit<sup>[2]\*</sup>, Noam Tal-Perry<sup>[1]</sup>, Marisa Carrasco<sup>[3]</sup> and Shlomit Yuval-  
4 Greenberg<sup>[1,2]</sup>

5 1. School of Psychological Sciences, Tel-Aviv University, Ramat Aviv, 6997801, Tel Aviv-Yafo, Israel

6 2. Sagol School of Neuroscience, Tel-Aviv University, Ramat Aviv, 6997801, Tel Aviv-Yafo, Israel

7 3. Department of Psychology and Center for Neural Science, New York University, 6 Washington Place,  
8 New York, NY, 10003, USA

9

10 \*The authors contributed equally to the study

11 Corresponding author: Shlomit Yuval-Greenberg,

12 email: [shlomitgr@tau.ac.il](mailto:shlomitgr@tau.ac.il)

13

## 14 **Acknowledgement**

15 We thank Noam Shimoni for his assistance in running the experiment, and Stephanie Badde  
16 for useful discussions. This study was funded by the United States-Israel Binational Science  
17 Foundation grant 2015201 to S.Y-G and M.C.

18

## 19 **Author Contributions**

20 D. Abeles, R. Amit, M. Carrasco and S. Yuval-Greenberg designed this research. D. Abeles  
21 and R. Amit performed the experiments. D. Abeles, R. Amit, and N. Tal analyzed the data. D.  
22 Abeles, M. Carrasco and S. Yuval-Greenberg wrote the manuscript.

23

24 The authors declare no competing interests

25

26 Key words: oculomotor inhibition, temporal expectations, saccades, blinks, auditory  
27 perception

## 28 **Abstract**

29 Eye movements are inhibited prior to the onset of temporally-predictable visual targets. This  
30 oculomotor inhibition effect could be considered a marker for the formation of temporal  
31 expectations and the allocation of temporal attention in the visual domain. Here we show  
32 that eye movements are also inhibited before predictable auditory targets. In two  
33 experiments, we manipulate the period between a cue and an auditory target to be either  
34 predictable or unpredictable. The findings show that although there is no perceptual gain  
35 from avoiding gaze-shifts in this procedure, saccades and blinks are inhibited prior to  
36 predictable relative to unpredictable auditory targets. These findings show that oculomotor  
37 inhibition occurs prior auditory targets. This link between auditory expectation and  
38 oculomotor behavior, [in combination with the results of our parallel study in the tactile](#)  
39 [domain](#), reveals a multimodal perception action coupling, which has a central role in temporal  
40 expectations.

41

## 42 **Introduction**

43 Temporal expectations are formed based on temporal regularities, and can be used to  
44 distribute processing resources effectively across time. The effect of temporal expectations  
45 on perceptual readiness is often demonstrated by enhanced behavioral performance, i.e.  
46 faster reaction times (RTs) and higher accuracy-rates for anticipated targets<sup>1</sup>. However, these  
47 traditional behavioral correlates of temporal expectations provide only a retrospective  
48 evaluation of information processing, as they are assessed only after target onset, once the  
49 formation of expectations has already been completed. In contrast, monitoring eye  
50 movements can provide a reliable estimate of temporal expectations, while they are being  
51 formed, i.e. prior to the target appearance. We have found that saccades and blinks are more  
52 strongly inhibited prior to the appearance of a predictable, relative to an unpredictable, visual  
53 target. This pre-target oculomotor effect emerged with targets embedded in a rhythmic  
54 stream of stimulation<sup>2</sup>, with targets associated with temporal cues<sup>3</sup>, and in a temporal  
55 attention task in which the time of the target was fully predictable and selective attention  
56 was manipulated<sup>4</sup>.

57 The purpose of this pre-target oculomotor inhibition is still unknown. Given that we had

58 investigated this effect with visual targets only, we hypothesized that oculomotor inhibition  
59 could support vision by reducing the occurrence of eye movements and blinks during target  
60 presentation, which could impair target detection and discrimination.

61 The purpose of the present study was to examine whether pre-target oculomotor inhibition  
62 is evident also prior to predictable auditory targets. In a parallel study (REF), we examined the  
63 same question in the tactile modality. The question of whether pre-target oculomotor  
64 inhibition effect is present in non-visual modalities has important implications for explaining  
65 this effect. Finding no oculomotor inhibition prior to predictable auditory targets would  
66 indicate that this effect reflects a within modality perception action coupling. Alternatively,  
67 finding an oculomotor inhibition effect for auditory targets would imply the existence of a  
68 multimodal perception action coupling.

69 Only a few studies have shown that non-visual processes can modulate eye movements  
70 during or after stimulation. For example, in audition, microsaccades are inhibited following  
71 stimulus presentation<sup>5,6</sup> and their direction is biased towards the locus of auditory attention<sup>7</sup>.  
72 Furthermore, cognitive load modulates oculomotor activity in auditory tasks<sup>8,9</sup> and even in  
73 mental arithmetic tasks<sup>10,11</sup>. However, it is yet unknown whether eye movements are  
74 modulated prior to non-visual task, i.e. whether they reflect non-visual expectation.

75 In this study we investigate the relation between oculomotor inhibition and auditory  
76 temporal expectations. In two experiments, we manipulate temporal expectation using an  
77 auditory temporal cue, while jittering the intervals between trials to avoid a rhythmic stream  
78 of auditory stimuli. Gaze positions are monitored while participants performed an auditory  
79 discrimination task preceded by temporally predictive or non-predictive auditory cues. In  
80 Experiment 1, we manipulate the interval between the cue and the target, called *foreperiod*,  
81 to be either predictable or unpredictable. In the predictable blocks 100% of the trials are  
82 composed of the same foreperiod, whereas in the unpredictable blocks the foreperiods are  
83 chosen randomly out of five possible options per trial (1–3 s in 0.5 s steps). Results revealed  
84 that saccades and blinks are inhibited prior to predictable auditory targets. In Experiment 2  
85 we evaluate whether oculomotor inhibition is also modulated by probabilistic predictability,  
86 i.e. when targets are only partially predictable. This second experiment is similar to  
87 Experiment 1, except that the predictable blocks include 80% trials with one foreperiod (1 s)  
88 and 20% with another (2.2 s). In the unpredictable blocks of Experiment 2 the foreperiods are

89 chosen randomly out of five possible options (1–3 s in 0.5 s steps, as in Experiment 1). Results  
90 of both experiments reveal that saccades and blinks are inhibited prior to predictable auditory  
91 targets. We conclude that pre-target oculomotor inhibition reflects multimodal perception  
92 action coupling, which could function as a mechanism of temporal expectation. Thus, future  
93 studies could use pre-target oculomotor inhibition effects as a biomarker of temporal  
94 expectation.

## 95 Experiment 1

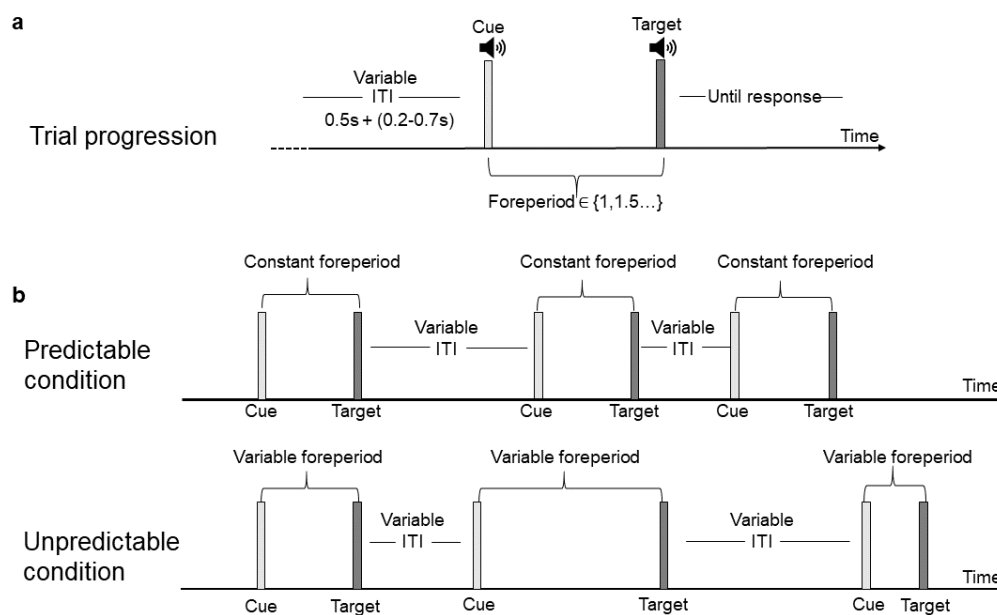

96  
97 **Figure 1.** *Experimental procedure of Experiment 1.* A) After an online gaze contingent procedure confirmed  
98 fixation ( $<0.5^\circ$  off center) and following an additional random inter-trial-interval (ITI; 0.2-0.7 s), the temporal cue  
99 (pure tone of 5 KHz) was played for 33 ms, marking the onset of the foreperiod (1-3 s with 0.5 s gaps). After the  
100 foreperiod, the target tone (descending or ascending chirp sound) was played for 33 ms and participants were  
101 asked to perform a 2-alternative forced choice (2AFC) discrimination task: report whether the chirp was  
102 ascending or descending by pressing one of two buttons. Participants were instructed to be as accurate as  
103 possible and to respond within the 4 seconds response window. Following the response, or after 4 s without  
104 one, the fixation-cross changed color to gray for 200 ms to signal the end of the trial. B) The foreperiod was  
105 either constant throughout the block (predictable condition) or changed randomly in different trials within the  
106 same block (unpredictable condition). Thus, the cue acted as a 100% valid temporal cue in the predictable  
107 condition but was uninformative regarding target timing in the unpredictable condition. The stimuli were  
108 identical in the two conditions, and differed only in the validity of the temporal cue in predicting the time of the  
109 target. Participants were not informed as to any predictability; therefore, all temporal expectations were

110 learned incidentally.

111

## 112 Results

### 113 Behavioral performance: accuracy-rates and reaction times

114 Accuracy-rates and reaction times (RT) were calculated separately for each participant,  
115 condition and foreperiod. A two-way repeated measures ANOVA with factors Predictability  
116 (predictable/unpredictable) and Foreperiod (1, 1.5, 2, 2.5, 3 s) revealed no evidence for  
117 differences in accuracy-rates between predictability conditions ( $F(1,19) = 1.62, p = 0.22$ ) or  
118 foreperiods ( $F(4,76) = 0.81, p = 0.52$ ), and no significant interaction between these two factors  
119 ( $F(4,76) = 0.39, p = 0.746$ ). The same analysis performed on RT of correct trials (secondary  
120 variable) revealed a significant main effect of foreperiod ( $F(4,76) = 4.83, p = 0.006, \epsilon = 0.708,$   
121  $\eta_p^2 = 0.203$ ), no significant main effect of Predictability ( $F(1,19) = 1.44, p = 0.24$ ), and no  
122 significant interaction of these two factors ( $F(4,76) = 1.87, p = 0.15, \epsilon = 0.669$ ). We conducted  
123 trend analysis across foreperiods separately for each predictability condition. A significant  
124 linear trend was evident in the predictable condition ( $F(1,19) = 6.815, p = 0.017, \eta_p^2 = 2.64$ ),  
125 as expected from the known relation between RT and foreperiod<sup>3,12</sup>. No significant trend was  
126 found in the unpredictable condition ( $F(1,19) = 1.808, p = 0.195$ ). These findings are depicted  
127 in Figure 2.

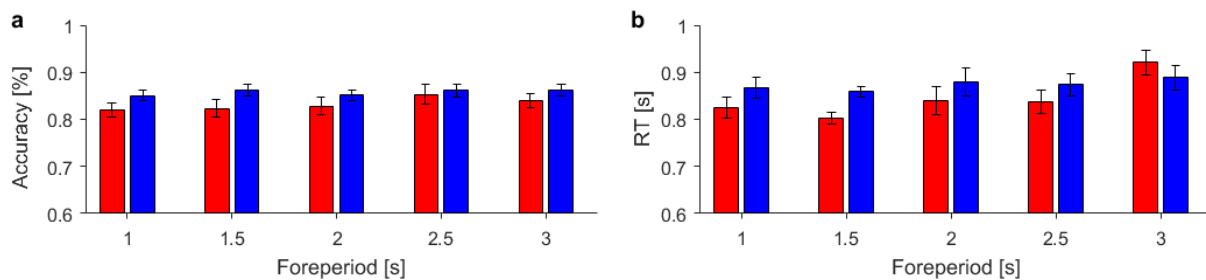

128

129 **Figure 2.** Reaction times (RTs) and accuracy by predictability and foreperiod. A) Accuracy-rates in predictable  
130 (red bars) and unpredictable (blue bars) conditions B) Reaction times in predictable (Red bars) and unpredictable  
131 (blue bars) conditions. Error bars denote  $\pm$  one standard error of the mean, corrected for within subjects  
132 variability<sup>13</sup>. Source data are provided as a Source Data file.

133

### 134 Saccades

135 *Pre-target saccade rate.* The time series of saccade rate were constructed for each participant  
136 and condition and smoothed using a sliding window of 50 ms. A two-way repeated-measures  
137 ANOVA was performed on the average saccade rate at -100-0 ms relative to target onset, with  
138 factors Predictability (predictable/unpredictable) and Foreperiod (1-3 s, with 0.5 s gaps).  
139 There was a significant effect of Predictability ( $F(1,19) = 21.943$ ,  $p < 0.001$ ,  $\eta_p^2 = 0.536$ ),  
140 arising from stronger inhibition of saccades in the predictable than the unpredictable  
141 condition. This predictability effect indicates that saccade-inhibition was a marker for the  
142 ability to anticipate the occurrence of an expected event (Figure 3). This effect is consistent  
143 with our findings in the visual domain<sup>2,3</sup>. A significant main effect of foreperiod ( $F(4,76) =$   
144  $3.241$ ,  $p = 0.016$ ,  $\eta_p^2 = 0.146$ ) indicated that saccade rate varied among foreperiods, but  
145 there were no significant linear or quadratic trends for this variation (Linear:  $F = 0.131$   $p =$   
146  $0.721$ ; Quadratic:  $F = 1.778$ ,  $p = 0.198$ ). The interaction between Predictability and Foreperiod  
147 was not significant ( $F(4,76) = 1.288$ ,  $p = 0.282$ ), suggesting that the predictability effect of  
148 oculomotor inhibition was similarly evident in all foreperiods (Figure 4a). We conducted  
149 separate trend analyses on each predictability condition and found no significant linear or  
150 quadratic trends in either of them.

151 *Saccade rate slope.* To examine the evolution of oculomotor inhibition over time, we  
152 calculated the slope of saccade rate across time as the difference between the average  
153 saccade rate at the pre-target window (-100-0 ms relative to target onset) and the average  
154 saccade rate at 400-500 ms post cue, divided by the time between these two windows in  
155 seconds. A two-way repeated measures ANOVA was conducted with saccade rate slope as  
156 the dependent variable and foreperiod and predictability as the independent variables  
157 (**Figure 4b**). There was a significant main effect for predictability condition ( $F(1,19) = 5.08$ ,  $p$   
158  $= 0.036$ ,  $\eta_p^2 = 0.211$ ) resulting from a steeper slope in the predictable than the unpredictable  
159 condition. There was a significant main effect of foreperiod ( $F(4,76) = 5.923$ ,  $p = 0.012$ ,  $\varepsilon =$   
160  $0.380$ ,  $\eta_p^2 = 0.238$ ) indicative of a negative linear trend: the slope was shallower for longer  
161 foreperiods ( $F(1,19) = 14.482$ ,  $p < 0.001$ ,  $\eta_p^2 = 0.433$ ). The interaction between foreperiod  
162 and predictability was not significant ( $F(4,76) = 0.604$ ,  $p = 0.661$ ,  $\varepsilon = 0.520$ ). We conducted  
163 separate trend analyses on the two predictability conditions. This analysis revealed a  
164 significant linear trend in the predictable condition ( $F(1,19) = 10.158$ ,  $p = 0.005$ ,  $\eta_p^2 = 0.348$ ),  
165 reflecting steeper slopes for shorter than for longer foreperiods, but only a marginal trend in

166 the unpredictable condition ( $F(1,19) = 3.746, p = 0.068$ ). This may suggest that, consistently  
167 with our findings in the visual modality<sup>3</sup>, the saccade rate slope was adjusted according to the  
168 expected foreperiod duration to reach maximal inhibition at target onset.

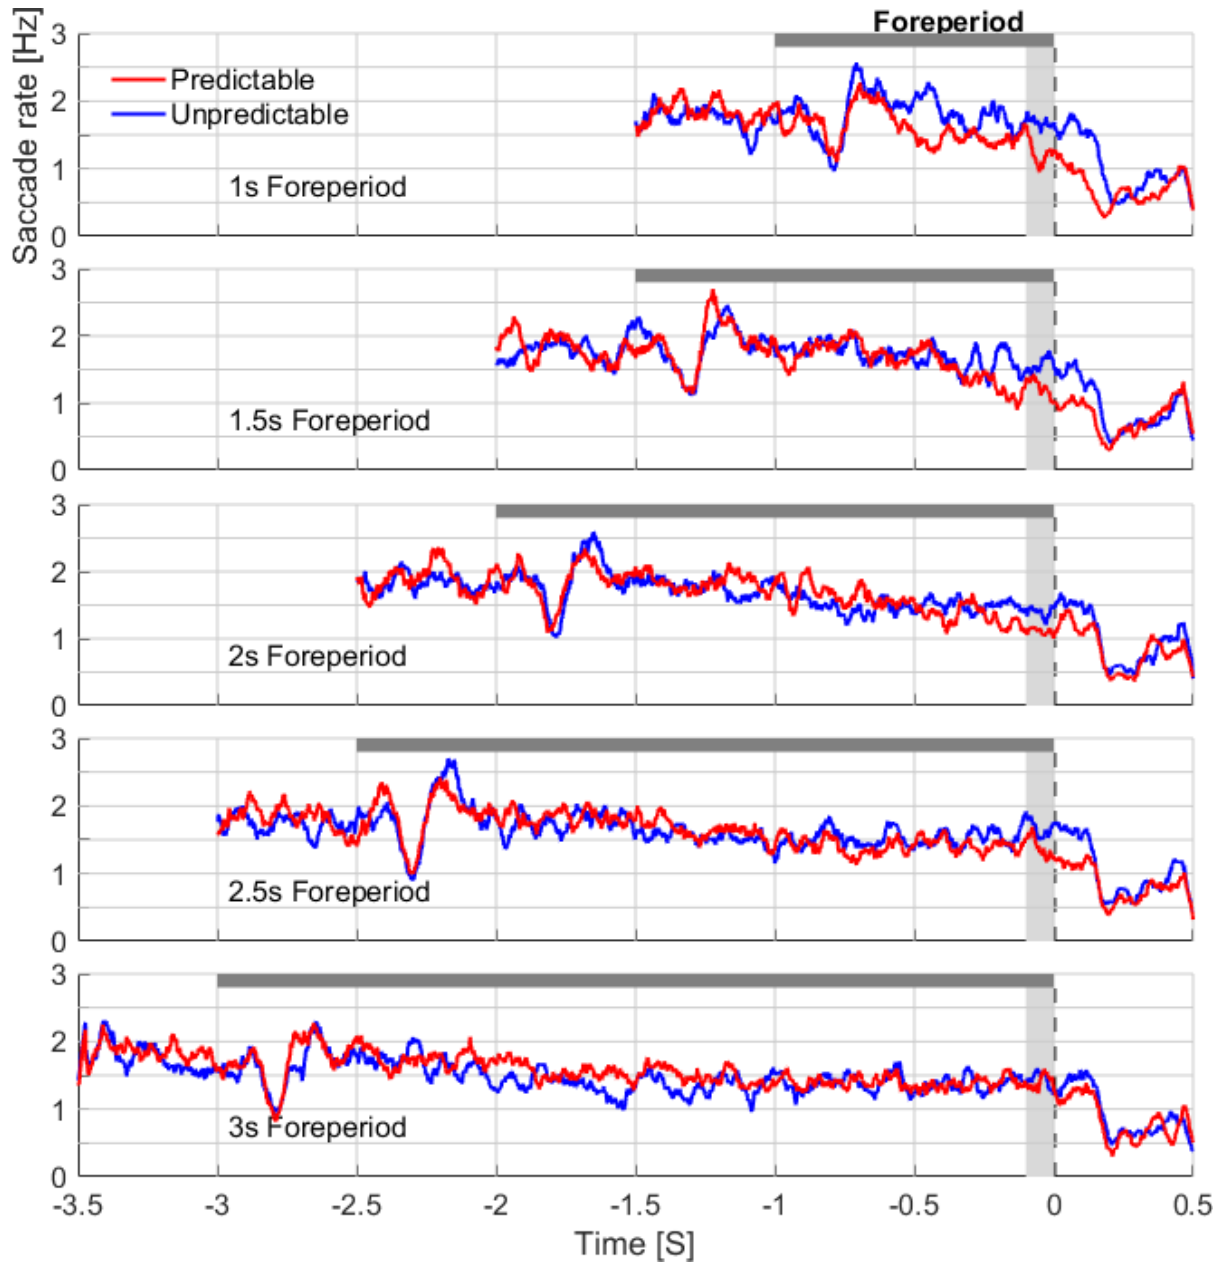

169

170 **Figure 3.** Saccade rates by predictability and foreperiod. Grand average ( $n=20$ ) saccade rate traces in the  
171 predictable (red) and unpredictable (blue) conditions in each foreperiod duration. The dark gray horizontal  
172 rectangle represents the foreperiod duration. The dashed line represents target onset. The light gray shading  
173 represents the analyzed interval. Source data are provided as a Source Data file.

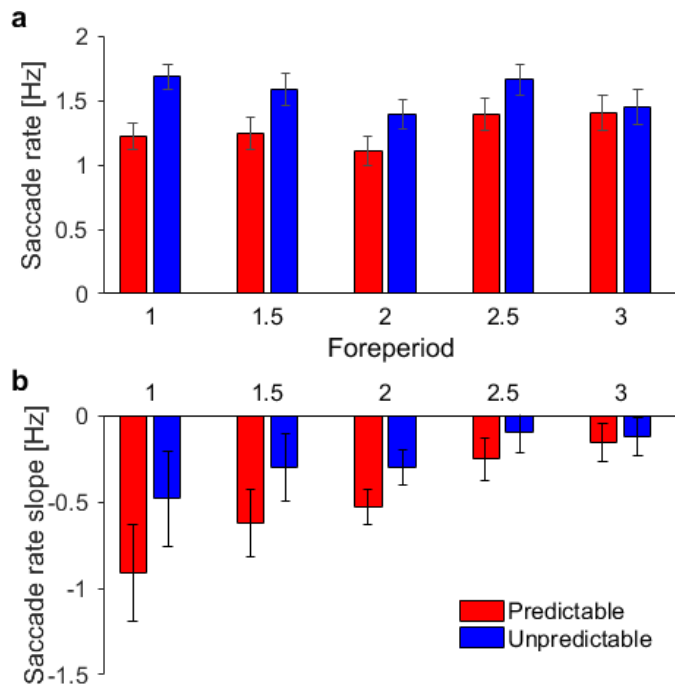

174

175 **Figure 4.** *Pre-target saccade rates by predictability and foreperiod* A) Grand average pre-target saccade rate in  
176 the predictable (red) and unpredictable (blue) conditions at -100-0 ms relative to target onset; B) Saccade rate  
177 slope assessed by calculating the normalized difference between saccade rate in the interval 400-500 ms  
178 following cue onset and saccade rate in the interval -100-0 ms relative to target onset at 0. This difference value  
179 was then divided by the time in seconds between the two intervals. Error bars denote  $\pm 1$  standard error of the  
180 mean, corrected for within subjects variability<sup>13</sup>. Source data are provided as a Source Data file.

181

## 182 **Blink rate**

183 *Pre-target blink rate.* The time series of blink rate were constructed for each participant and  
184 condition and smoothed using a sliding window of 100 ms. A two-way repeated measures  
185 ANOVA with factors Predictability and Foreperiod was performed on the average pre-target  
186 blink rate at -500-0 relative to target onset. This analysis revealed a main effect of  
187 Predictability ( $F(1,19) = 5.568, p = 0.029, \eta_p^2 = 0.227$ ; **Figure 5**), a significant main effect of  
188 Foreperiod ( $F(4,76) = 4.555, p = 0.015, \epsilon = 0.537, \eta_p^2 = 0.193$ ) and a significant interaction  
189 between them ( $F(4,76) = 4.66, p = 0.008, \epsilon = 0.657, \eta_p^2 = 0.197$ ). In the predictable condition,  
190 a significant positive linear trend was found for foreperiod ( $F(1,19) = 6.09, p = 0.023, \eta_p^2 =$   
191  $0.243$ ), reflecting an increase in blink rate with increased foreperiod duration. In contrast, in  
192 the unpredictable condition, no significant linear trend was found ( $F(1,19) = 0.18, p = 0.067$ )  
193 but a significant quadratic trend ( $F(1,19) = 14.267, p < 0.001, \eta_p^2 = 0.429$ ) emerged. This  
194 suggests that in the unpredictable condition inhibition was strongest at the average



195 foreperiod of 2 s and gradually increased towards shorter and longer foreperiods. Blink rate  
196 slopes analysis was not conducted as blinks were too sparse to reliably estimate the slope of  
197 their rate function.

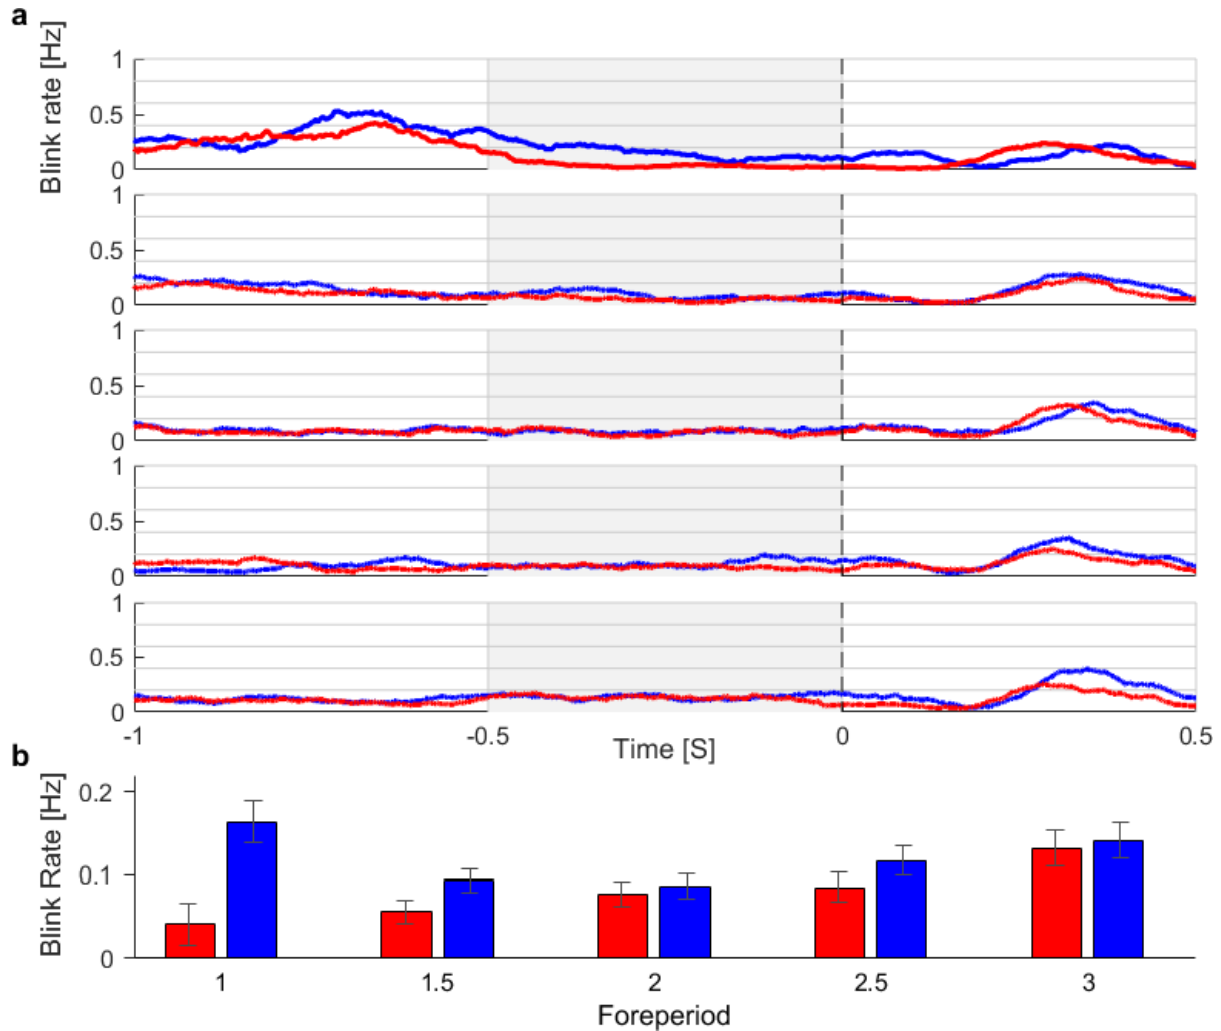

198

199 **Figure 5.** *Blink rates by predictability and foreperiod.* A) Grand average (n=20) blink rate traces in the predictable  
200 (red) and unpredictable (blue) conditions in each foreperiod duration, smoothed with a sliding window of 100  
201 ms. The light gray rectangles mark the analysis window. The dashed line represents target onset. B) Grand  
202 average pre-target blink rate in the regular (red bars) and irregular (blue bars) conditions at -500-0 ms relative  
203 to target onset. Error bars denote  $\pm 1$  standard error of the mean, corrected for within-subjects variability.  
204 Source data are provided as a Source Data file.

205

## 206 Behavioral consequences of oculomotor events

207 We examined the perceptual consequences of oculomotor inhibition using two approaches:  
208 (1) We compared the behavioral measures of trials in which saccades overlapped with

209 stimulus presentation (saccade onset at -10 to 33 ms relative to target onset), and trials in  
210 which no saccades were found in this interval; (2) We compared pre-target (-100-0 ms relative  
211 to target onset) saccade rate in correct vs. incorrect trials and fast vs. slow response trials,  
212 divided according to the median. For both of these analyses, we focused only on trials of the  
213 unpredictable condition in which any differences found between trials with and without  
214 saccades could be attributed to the influence of the saccades per se, rather than to the  
215 formation of cue-based temporal expectations. In contrast, in the predictable condition, it is  
216 impossible to dissociate whether effects would emerge because saccades may have  
217 interfered with auditory perception or because temporal expectations were not precise  
218 enough in these trials and thus saccades were not suppressed at the right timing.

219 (1) Paired sample t-tests were conducted separately for accuracy rates and RT of the  
220 unpredictable condition to compare performance in saccade trials (trials with saccades at -10  
221 to 33 ms relative to target onset) and no saccade trials, collapsed across foreperiods. No  
222 significant differences were found between the two trial types in accuracy rates (with  
223 saccades: mean = 0.867, SD = 0.11; without saccades: mean = 0.861, SD = 0.097;  $t(19) = 0.59$ ,  
224  $p = 0.563$ ) and RTs (with saccades: mean = 0.927, SD = 0.22; without saccades: mean = 0.901,  
225 SD = 0.263;  $t(19) = 1.28$ ,  $p = 0.214$ ), suggesting that the occurrence of a saccade during target  
226 presentation did not influence performance in the task.

227 **(2)** Two paired sample t-tests were conducted to compare the pre-target saccade rates in  
228 correct vs. incorrect trials and in slow vs. fast trials based on a median split. No significant  
229 differences in pre-target saccade rate were found between high and low performance trials  
230 (Correct: mean = 1.556, SD = 0.47; Incorrect: mean = 1.334, SD = 0.816: Correct vs. Incorrect:  
231  $t(19) = 1.4$ ,  $p = 0.178$ ; Fast: mean = 1.561, SD = 0.524; Slow: mean = 1.476, SD = 0.482; Fast  
232 vs. Slow:  $t(19) = 1.54$ ,  $p = 0.139$ , **Figure 6**). Blinks occurrences during target presentation were  
233 too rare to allow performing a similar analysis on blinks.

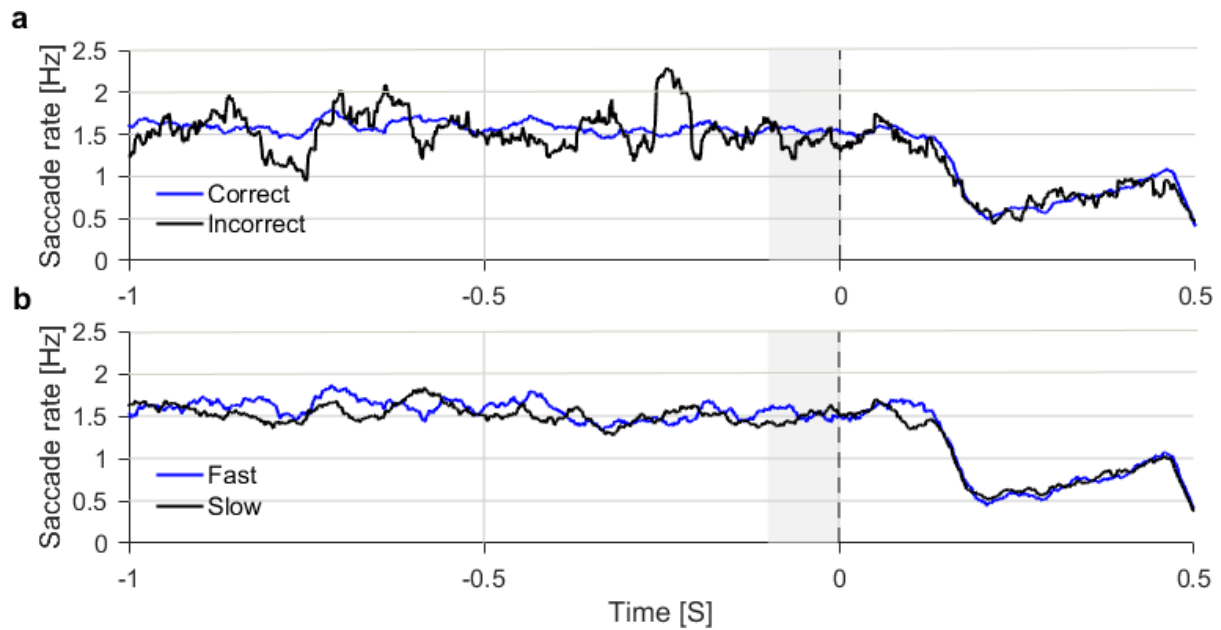

234

235 **Figure 6:** Saccade rates according to discrimination response accuracy. A) Grand average saccade rates in correct  
236 trials (light blue) and incorrect trials (dark blue) of the unpredictable condition. The dashed line represents target  
237 onset. The gray rectangle marks the pre-stimulus analysis window. B) Grand average saccade rates in fast trials  
238 (light blue) and slow trials (dark blue) of the unpredictable condition, divided according to the median.

239

## 240 Experiment 2

241 In the predictable condition of Experiment 1 there was 100% certainty regarding the timing  
242 of the target relative to the cue. We found that saccades and blinks are inhibited prior to the  
243 100% predictable targets. The purpose of this experiment was to examine whether this  
244 inhibition also occurs when predictability is probabilistic; i.e. for targets that are mostly  
245 instead of fully predictable. We hypothesized that saccades and blinks will be inhibited prior  
246 to the most probable target onset even in this condition in which the intervals are not  
247 constant.

248 In Experiment 1 we established the predictability effects across different foreperiods. In this  
249 second experiment, which required more trial repetitions than the previous one, we decided  
250 to focus solely on one foreperiod, and consequently avoid the necessity of having multiple  
251 types of predictable blocks. We focused on the shortest foreperiod of 1 s, as performance for  
252 short foreperiods is less affected by modulations that are due to the progress of time  
253 following the cue. It is well-known that with variable foreperiods, reaction time is faster for  
254 longer foreperiods<sup>12</sup>. This effect is thought to be related to expectation modulations caused

255 by changes across time in the probability of an event to occur given that it has not occurred  
256 yet (conditional probabilities).

257

## 258 Results

### 259 Behavioral performance: accuracy-rates and reaction times

260 Participants performed better when presented with 80% predictable than unpredictable  
261 targets (**Figure 7**). Paired samples t-test showed that participants had significantly higher  
262 accuracy rates in the 80% predictable (mean accuracy rate = 0.868,  $SD = 0.105$ ) than in the  
263 unpredictable (mean accuracy rate = 0.826,  $SD = 0.104$ ) condition ( $t(19) = 3.031$ ,  $p = 0.007$ ,  
264 Cohen's  $d = 0.677$ ). Similarly, participants responded significantly faster to 80% predictable  
265 (mean RT = 0.748,  $SD = 0.227$ ) than to unpredictable (mean RT = 0.825 s,  $SD = 0.241$ ) targets  
266 ( $t(19) = -2.948$ ,  $SD = 0.118$ ,  $p = 0.008$ , Cohen's  $d = -0.659$ ).

267

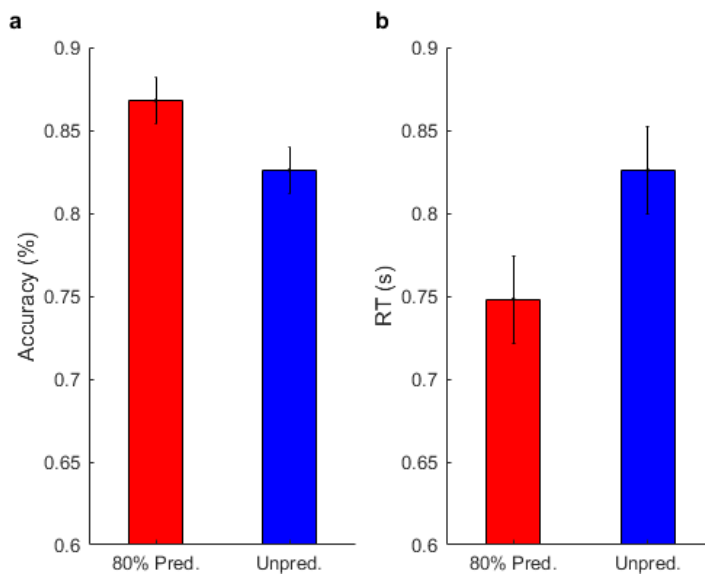

268

269 **Figure 7:** Experiment 2: Reaction times (RTs) and accuracy in the 1 second foreperiod. A) Accuracy-rates in  
270 predictable (red bars) and unpredictable (blue bars) conditions B) Reaction times in predictable (red bars) and  
271 unpredictable (blue bars) conditions. Error bars denote  $\pm 1$  standard error of the mean, corrected for within  
272 subjects variability<sup>13</sup>. Source data are provided as a Source Data file.

273

### 274 Saccades

275 *Pre-target saccade rate.* Participants were less likely to initiate a saccade prior to the target

276 when it was anticipated with 80% probability to appear 1000 ms following the cue than when  
277 it was unpredictable. The smoothed saccade rate traces of both conditions are depicted in  
278 **Figure 8a**. A paired-samples t-test confirmed that saccade rate at the analyzed interval (900-  
279 1000 ms relative to cue onset) was significantly lower in the 80% predictable condition (mean  
280 rate = 1.19,  $SD = 0.596$ ) than in the unpredictable condition (mean rate 1.45,  $SD = 0.562$ ;  $t(19)$   
281 = -2.904,  $p = 0.009$  Cohen's  $d = -0.649$ ).

282 *Saccade rate slope*. Similarly, the slope of saccade rate following the cue presentation was  
283 steeper when a target onset was expected after 1 s. A paired-samples t-test confirmed that  
284 the saccade rate slope (the difference between the 900-1000 ms and the 400-500 ms post-  
285 cue rates) was significantly steeper in the predictable (mean slope = -0.845,  $SD = 1.01$ ) than  
286 unpredictable (mean slope = -0.11,  $SD = 0.874$ ) conditions ( $t(19) = -2.648$ ,  $p = 0.016$ , Cohen's  
287  $d = -0.59$ ).

288

## 289 **Blinks**

290 *Pre-target blink rate*. Blinks were less likely to occur prior to target onset when it was  
291 anticipated at 80% chance than when it was unpredictable (**Figure 8b**). In the analyzed  
292 interval (500-1000 ms relative to cue onset), paired samples t-test confirmed that, in the  
293 analyzed interval (500-1000 ms relative to cue onset), blink rate was lower in the 80%  
294 predictable (mean rate = 0.067,  $SD = 0.073$ ) than in the unpredictable (mean rate = 0.113,  $SD$   
295 = 0.084) condition ( $t(19) = -3.427$ ,  $p = 0.003$ , Cohen's  $d = -0.766$ ).

296

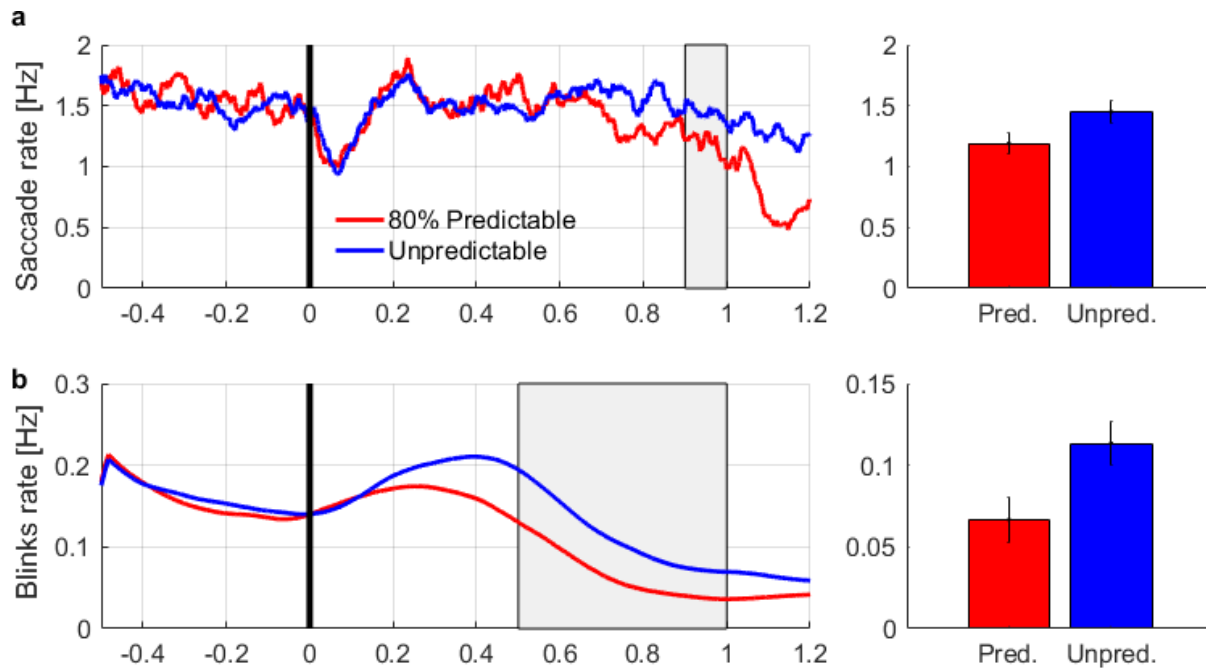

297

298

299

300

301

302

303

304

305

306

307

308

309

310

311

312

313

314

315

316

317

**Figure 8: Experiment 2: Saccade rates and blink rates.** A) Grand average saccade rate traces in the 80% predictable (red) and the unpredictable (blue) conditions. The gray rectangle marks the 900-1000 ms post-cue analysis window. The black line represents cue offset. The bar graph to the right depicts the calculated saccade rate average within the analysis window. Error bars denote  $\pm 1$  standard error of the mean, corrected for within subjects variability<sup>13</sup>. B) Grand average of the blink rates traces in the 80% predictable (red) and the unpredictable (blue) conditions. The gray rectangle marks the 500-1000 ms post cue analysis window. The black line represents cue offset. The bar graph to the right represents the calculated blink rate average within the analysis window. Error bars denote  $\pm 1$  standard error of the mean, corrected for within subjects variability<sup>13</sup>. Source data are provided as a Source Data file.

## Discussion

Temporal predictability was manipulated by presenting either predictable or unpredictable targets in different blocks. In Experiment 1 the timing of predictable targets was 100% predictable and in Experiment 2 it was only 80% predictable. In both cases, even though cues and targets were auditory and there was no visual task other than maintaining fixation, saccades and blinks were reduced shortly prior to the onset and more so for predictable than unpredictable targets. Furthermore, in Experiment 1 we examined the evolution of this inhibition across time was also modulated by predictability, and found that the decrease in saccade rate prior to the onset of the target (slope) was steeper for predictable than unpredictable intervals in both experiments. In Experiment 2 we showed that the effect does

318 not necessitate full certainty; it is induced also by probabilistic information, when there is  
319 only 80% probability for the predictable intervals. These results suggest that oculomotor  
320 activity was adjusted to reach a minimum at the onset of the anticipated auditory target.  
321 These findings, consistent with our results in the visual<sup>3</sup> and tactile (REF) domains, reveal that  
322 the execution of oculomotor events is modulated by target's predictability, even when the  
323 target is auditory.

324 The present experiments revealed that oculomotor inhibition measurements reliably showed  
325 a predictability effect, demonstrating its effectiveness in indexing temporal expectations and  
326 revealing a link between oculomotor behavior and auditory temporal expectation. In  
327 contrast, behavioral indices only emerged in Experiment 2, in which accuracy was higher and  
328 RT was faster in the predictable than the unpredictable conditions. Some studies have  
329 reported effects of temporal expectation on accuracy and RT<sup>12,14,15</sup> (add tactile REF) but  
330 others have failed to do so<sup>3,16,17</sup>. Some task demands and/or stimulus parameters may be  
331 responsible for these differences. Consistent with our previous study<sup>3</sup>, the present findings  
332 support the hypothesis that oculomotor inhibition is a reliable index of predictability that is  
333 less affected by task demands and stimulus parameters.

334 The perceptual system is constantly exploring the environment. As humans, vision is our  
335 dominant source of input and eye movements are critical for exploration: We gather  
336 information on the surroundings by shifting our gaze from one location of interest to another.  
337 Visual exploration through eye movements is such a basic drive in humans that it occurs even  
338 when visual information is entirely irrelevant, such as when performing non-visual tasks<sup>18</sup>.  
339 However, during the anticipation period, while the perceptual system prepares to process an  
340 upcoming target, it may be counterproductive to accumulate new inputs through active  
341 exploration. During this period, it may be advantageous to briefly pause exploration and focus  
342 resources on the anticipated stimulus. Our present findings of an inhibition of saccades prior  
343 to anticipated targets is consistent with this hypothesis, as they show that the freeze of visual  
344 exploration occurs even when anticipating an auditory stimulus.

345 The duration of the foreperiod – the interval between cue and target – is known to affect  
346 temporal expectations. When foreperiods are constant, longer foreperiods usually result in  
347 slower RTs and when foreperiods are variable, longer foreperiods usually result in faster RTs  
348 <sup>12,19,20</sup>.

349 In the visual modality<sup>3</sup>, we found that oculomotor inhibition featured both expected trends  
350 across foreperiods. Pre-target saccade rate increased with foreperiod duration in the  
351 predictable condition and decreased in the unpredictable condition. In Experiment 1 we  
352 examined predictability effects across a range of foreperiods and found neither of these  
353 trends with saccades, and only the negative trend of the predictable condition with blinks (i.e.  
354 higher blink rate for longer foreperiods). These results may suggest that there are several sub-  
355 processes involved in temporal expectations: the basic anticipatory process that  
356 differentiates predictable and unpredictable targets is effective for both visual and auditory  
357 targets, but other processes may be specific to the visual modality. It is also possible that the  
358 more subtle processes can be exposed only with higher statistical power.

359 In the unpredictable condition there is minimal certainty regarding the timing of the target,  
360 but it could be hypothesized that some statistical inference can, nevertheless, be used to  
361 estimate the onset of the target. In Experiment 1, in which predictability effects were  
362 examined over a range of foreperiods, the findings support this hypothesis by showing that  
363 in the unpredictable condition microsaccadic inhibition was maximal in the mean (and  
364 median) foreperiod of 2 s. These results suggest that, in the absence of accurate information,  
365 statistical inference regarding the mean foreperiod was used to estimate the onset of the  
366 target.

367 Why are saccades and blinks inhibited prior to the occurrence of a predictable target? One  
368 possibility is that this pre-target oculomotor inhibition serves a functional role in perceptual  
369 performance, i.e. that avoiding saccades and blinks while anticipating a predictable target  
370 enhances subsequent target perception. This hypothesis is plausible when considering visual  
371 targets and tasks. Saccades and blinks are known to cause a temporary loss of visual input  
372 due to physical occlusion, image blur or masking<sup>21,22</sup> and also be accompanied by active  
373 suppression in sensory cortices ("blink suppression"<sup>23</sup>) and "saccadic suppression"<sup>24</sup>.  
374 Consistently, in our previous study on temporal expectations in the visual domain, we found  
375 decreased accuracy-rates and increased RTs when saccades were performed during target  
376 presentation<sup>3</sup>. Notably despite the fact that the observed oculomotor inhibition in that study  
377 lasted for a few hundred milliseconds prior to target onset, we did not find any perceptual  
378 advantage for inhibiting oculomotor events that did not overlap with target presentation. This  
379 longer inhibition period could nevertheless serve a functional role as it may reduce the



380 likelihood that an oculomotor behavior would occur around the time of target presentation.  
381 Remarkably, in both experiments of the present study and in our [parallel tactile study \(REF\)](#)  
382 we find oculomotor inhibition prior to auditory [and tactile targets](#), in the absence of any visual  
383 event. It is unlikely that eye movements would cause any loss of input [with auditory or tactile](#)  
384 [stimulation](#), as most sources of oculomotor interference (occlusion, blur and masking) do not  
385 auditory perception in non-visual modalities. It is possible, in principle, that active cortical  
386 suppression during saccade and blinks would affect not only the visual cortex but also other  
387 sensory cortices, either by cross-modal interactions or by global mechanisms. However, there  
388 is currently no evidence supporting the existence of such an effect, and indeed, the detection  
389 of auditory targets is not affected by concurrent saccades<sup>25</sup>. In the present study, we found  
390 no behavioral cost for executing a saccade, even during target presentation, as would be  
391 predicted if active cortical suppression was involved (but see different findings [in the tactile](#)  
392 [domain add REF](#)). These findings suggest that, regardless of the mechanism that drives this  
393 effect, oculomotor inhibition prior to predictable stimulation does not occur solely for  
394 functional advantages.

395 The present study reveals a correlate of temporal expectations, by showing that oculomotor  
396 inhibition is present prior to auditory targets. This inhibition emerged even in a task in which  
397 performance was completely unaffected by the execution of oculomotor events. These  
398 findings are consistent with studies showing other multimodal aspects of temporal  
399 expectations: (1) an event related potentials (ERP) study in which temporal attention affected  
400 the early post-target ERP components of both [tactile and visual responses](#), regardless of the  
401 modality of the specific task<sup>26</sup>; (2) Participants performed better in visual tasks when the  
402 visual target appearance was synchronized with the beat of an irrelevant auditory rhythm<sup>27,28</sup>.  
403 Beyond these studies showing post-target consequences of temporal expectations, [and with](#)  
404 [our parallel study on the tactile domain \(REF\)](#), the present study reveals that perceptual  
405 expectation is tightly coupled to oculomotor action.

406 In this study we used a common design for studying expectations, in which predictability is  
407 manipulated across blocks<sup>3,20,29–32</sup>. With this type of design, preparation effects may reflect  
408 both an intentionally driven preparatory process guided by expectancies and an unintentional  
409 process that is based on a conditioned response elicited by the cue<sup>33,34</sup>. According to the  
410 conditioning view, predictability effects are due to ‘trace conditioning’ – a conditioned

411 response that is time locked to a conditioning stimulus (the cue) and peaks around the time  
412 of the conditioned stimulus (the target). In the predictable condition, the constant interval  
413 between the cue and the target is repeatedly reinforced, while other intervals are suppressed.  
414 In contrast, in the unpredictable blocks with varied intervals there is no continuous  
415 reinforcement. It is unknown whether conditioning is involved in the oculomotor inhibition  
416 effect, yet it has already been determined that conditioning is not the sole explanation for  
417 the temporal orientation effects in RTs<sup>35</sup>. Given that saccades may be performed either  
418 voluntarily or involuntarily, the link revealed in this study between saccadic inhibition and  
419 temporal expectation is consistent with a combination of intentional and unintentional  
420 processes in mediating temporal expectations.

421 The link between temporal expectation and oculomotor inhibition is likely mediated by an  
422 interaction of cortical and subcortical structures, consistent with the possibility of both  
423 intentional and unintentional processes. For example, the dorsolateral prefrontal cortex  
424 (DLPFC) is involved in various tasks of temporal expectation and timing of intervals<sup>36-41</sup>, and  
425 has extensive direct and indirect connections to the main cortical and midbrain oculomotor  
426 areas<sup>42</sup>. The DLPFC also contains neurons that directly project to the superior colliculus (SC),  
427 a midbrain region that controls saccadic eye movements<sup>43</sup>, which is connected to oculomotor  
428 cortical areas, such as the frontal eye field (FEF), the supplementary eye field (SEF) and the  
429 parietal eye field (PEF)<sup>42,44,45</sup>. The DLPFC is specifically involved in saccadic inhibition, which is  
430 mediated by the direct connection to the SC through the prefrontal-collicular tract<sup>45</sup>, and by  
431 the indirect connection to the SC via the basal ganglia<sup>46,47</sup>. These areas may also be involved  
432 in the oculomotor inhibition mechanism of temporal expectations. It is unlikely that only  
433 subcortical structures mediate the oculomotor inhibition effect, as the responsible structures  
434 should enable the perception and retention of the duration of intervals. Whereas the  
435 autonomic system, previously associated with expectations<sup>48</sup>, is unlikely to have this timing  
436 abilities, the cerebellum may be a relevant structure as it has been implicated in the formation  
437 of cue-based expectations<sup>49</sup> and in conditioning<sup>50</sup>.

438 Importantly, regardless of whether oculomotor inhibition is driven by a bottom-up, a top-  
439 down, or both mechanisms, and regardless of whether it involves sub-cortical or cortical  
440 regions or both, the present findings reveal that it is tightly linked to temporal expectations,  
441 and that this link goes beyond a mere functional role of preventing negative effects of

442 saccadic movements and corresponding blur on visual perception.

443 Brain regions that are involved in the oculomotor inhibition effect, may be either part of a  
444 crossmodal or a supramodal system. The crossmodal hypothesis suggests that oculomotor  
445 inhibition prior to auditory targets is the result of crossmodal interactions between the two  
446 sensory modalities. According to this view, the visual system prepares for an upcoming  
447 predictable event, even when this event is not visual. This visual preparation is reflected by a  
448 reduction in the number of eye movements prior to a predictable auditory target. This view  
449 is supported by behavioral and neurophysiological findings suggesting that there are wide-  
450 spread crossmodal links between the visual and the auditory systems, some of which involve  
451 the oculomotor system<sup>7,51,52</sup>. In contrast, the supramodal hypothesis suggests that the  
452 oculomotor inhibition reflects a supramodal control mechanism of temporal expectation: a  
453 mechanism that is neither visual nor auditory but is involved in the formation of temporal  
454 expectations in both modalities. This view is supported by behavioral evidence showing that,  
455 in certain contexts, oculomotor behavior is modulated by non-sensory mechanisms that are  
456 not directly related to the visual system<sup>10,18</sup>.

457 To conclude, oculomotor inhibition reliably captures the existence of temporal prediction,  
458 regardless of the presence or absence of other behavioral predictability effects. The pre-  
459 target oculomotor inhibition marker of temporal expectations reflects the formation of  
460 expectations rather than their outcome; therefore, it is influenced solely by early pre-target  
461 processes and less sensitive to specific stimulus parameters, instructions and criterion.  
462 Together with the corresponding findings in the visual domain<sup>2,3</sup> and the tactile domain (REF),  
463 the present findings indicate that pre-target oculomotor inhibition is a marker of temporal  
464 expectation across vision, touch and audition. These findings reveal how our very basic  
465 human drive to explore can be momentarily paused in anticipation for an upcoming event of  
466 interest, even when this event will be processed via a different modality.

## 467 **Materials and Methods**

### 468 **Experiment 1**

#### 469 *Subjects*

470 Twenty-one students of Tel-Aviv University participated in the experiment in exchange for  
471 course credit or monetary compensation. One participant was discarded from all analysis due

472 to failure to comply with the task. Consequently, eye tracking and behavioral analysis were  
473 based on a total of 20 participants (14 females; Mean age  $22.9 \pm 2.7$ ). The sample size of  $N=20$   
474 was determined following a power analysis simulation described below.

475 All participants reported normal (uncorrected) vision and audition and no history of  
476 neurological disorders. All were naïve to the purpose of this study. The ethical committees of  
477 Tel Aviv University and the School of Psychological Sciences approved the study. All  
478 participants signed an informed consent.

479

#### 480 *Power analysis stimulation*

481 To determine the required number of participants that will lead to power of 80% using a two-  
482 tailed criterion of .05, we conducted a simulation based on data of our previous study<sup>3</sup> ( $N=20$ ).  
483 Data-sets were iteratively sampled (without replacement) to create random samples with sizes  
484  $\geq 5$ . For each sample size, resampling was based on 10,000 iterations. We conducted a 2x5  
485 repeated measures ANOVA on the data-set produced by each iteration, using the same factors  
486 as in the current experiment, and extracted the  $p$  value for Predictability (predictable/  
487 unpredictable). For each sample size, we then calculated the null rejection proportion (i.e.,  
488 power) out of all iterations. A sample size of 12 participants led to this result ( $1 - \beta = .86$ ),  
489 confirming that a cohort of 20 participants would be large enough to achieve reliable results  
490 with these effect sizes.

491

#### 492 *Stimuli*

493 The cue was a pure tone of 5 KHz, played for 33 ms. The target tone was a descending or  
494 ascending chirp sound lasting 33 ms, constructed from a linear swept-frequency pure tone,  
495 starting or ending at 800 Hz. A short pretest was conducted to set the difference between the  
496 two pitches of the chirp sound for each participant. Using a 1-up/2-down staircase procedure<sup>12</sup>,  
497 we aimed to obtain 70% accuracy rate. Following this procedure, the average other, higher  
498 pitch was 940.7 Hz (SD 89.91 Hz). The two pitches of the chirp sound remained constant  
499 throughout the experiment. All sounds were played binaurally over headphones (Audio-  
500 Technica ATH-M50x).

501

#### 502 *Procedure*

503 Participants sat, head resting on a headrest in a dimly lit sound-attenuated chamber, at a  
504 distance of 97cm from a display monitor (ASUS VG248QE, 120 Hz refresh rate) covering 30°  
505 of the horizontal visual field. In each trial, a black fixation cross (0.4°) was centrally presented  
506 on a mid-gray background. Participants were instructed to maintain fixation throughout the  
507 trial duration. After an online gaze contingent procedure confirmed fixation (<0.5° off center)  
508 and following an additional random interval (0.2-0.7 s), the temporal cue was played for 33  
509 ms, marking the onset of the foreperiod (1-3 s with 0.5 s gaps). After the foreperiod, the target  
510 tone was played for 33 ms and participants were asked to perform a 2-alternative forced choice  
511 (2AFC) discrimination task: report whether the chirp was ascending or descending by pressing  
512 one of two buttons. We instructed participants to be as accurate as possible and to respond  
513 within the 4 seconds response window. Following the response, or after 4 s without one, the  
514 fixation-cross changed color to gray for 200 ms to signal the end of the trial. **Figure 1** depicts  
515 the trial sequence.

516 The foreperiod was either constant throughout the block (predictable condition) or changed  
517 randomly in different trials within the same block (unpredictable condition). Thus, the cue  
518 acted as a 100% valid temporal cue in the predictable condition but was uninformative  
519 regarding target timing in the unpredictable condition. Importantly, the stimuli were identical  
520 in the two conditions, and differed only in the validity of the temporal cue in predicting the  
521 time of the target. Participants were not informed as to any predictability; therefore, all  
522 temporal expectations were learned incidentally. The experimental session was divided into 10  
523 blocks of 100 trials per block, lasting approximately 6.45 minutes each, half of which  
524 corresponded to the predictable condition and half to the unpredictable condition. The order of  
525 the blocks was counterbalanced across participants. There was an 8 minutes break after 5  
526 blocks, and shorter breaks between blocks, when necessary.

527

### 528 *Behavioral data analysis*

529 Accuracy-rates and reaction times (RT) were calculated separately for each participant,  
530 condition and foreperiod. Only correct trials were included in the RT analysis. Outlier RTs  
531 deviating by more than 2.5 standard deviations from the mean RT were excluded from analysis.

532

### 533 *Eye tracking acquisition and analysis*

534 Binocular gaze position was monitored using a remote infrared video-oculographic system

535 (Eyelink 1000 Plus; SR Research, Canada), with a spatial resolution  $\leq 0.01^\circ$  and average  
536 accuracy of  $0.25^\circ$ - $0.5^\circ$  when using a headrest (as reported by the manufacturer). Raw gaze  
537 positions were converted into degrees of visual angle using the 9-point-grid calibration,  
538 performed at the start of each experimental block and sampled at 1000 Hz.

539 Blinks were detected using the Eyelink's algorithm. Saccades were detected using a  
540 modification of a published algorithm<sup>13</sup> which was applied on filtered gaze position data (low-  
541 pass IIR Butterworth filter; cutoff 60 Hz; as in Amit, Abeles, Bar-Gad, & Yuval-Greenberg,  
542 2017<sup>14</sup>). An elliptic threshold criterion for microsaccades detection was determined in 2D  
543 velocity space based on the horizontal and the vertical velocities of the eye-movement.  
544 Specifically, we set the threshold to be six times the standard deviation (SD) of the eye-  
545 movement velocity, using a median-based estimate of the SD<sup>15</sup>. The SD estimate was set based  
546 on the recordings of each trial. A saccade onset was defined when six or more consecutive  
547 velocity samples were outside the ellipse, in both eyes.

548 Saccades offsets are sometimes accompanied by an "overshoot" which may be erroneously  
549 detected as a new saccade. Therefore, per standard procedure<sup>16-18</sup>, we imposed a minimum  
550 criterion of 50 ms for the interval between two consecutive saccades and kept only the first  
551 saccade in cases where two saccades were detected within such interval. Saccades of all sizes  
552 were included in the analysis, but due to the instruction to keep sustained fixation, most (mean  
553 87.6%, SD 10.3%) saccades were small (in the range of microsaccades,  $<1^\circ$ )<sup>19</sup>.

554 The time series of saccade-rate and blink rate were constructed for each participant by counting  
555 the number of saccade/blink events in each time-point across trials, separately for each  
556 condition and foreperiod, and dividing these values by the number of trials. The saccade time  
557 series was then smoothed using a sliding window of 50 ms, and multiplied by the sampling  
558 rate, converting the measure to Hz. Following our previous studies<sup>2,3</sup>, mean saccade rate in the  
559 time window of -100-0 ms relative to target onset was taken as the dependent variable for  
560 statistical analysis of pre-target saccade-rate (PSR). This time interval was chosen to assess  
561 saccade rate shortly prior to target onset. Since blink events are sparse and last longer, the blink  
562 rate time series was smoothed using a sliding window of 100 ms and averaged across a longer  
563 window of -500-0 ms relative to target onset and multiplied by the sampling rate to convert to  
564 Hz. Saccade rate slope was calculated as the difference between saccade rate at the pre-target  
565 window (-100-0 ms relative to target onset) and the post cue window (400-500 ms post cue  
566 onset, after the saccade rate returns to baseline following the cue presentation, a microsaccade-  
567 rate signature<sup>5</sup>) divided by the time difference in seconds between the two windows (which

568 was different for each foreperiod duration; as in Amit et al., 2019).

569

### 570 *Statistical analysis*

571 In Experiment 1, most statistical analyses were based on repeated measures ANOVAs with  
572 factors Predictability (predictable/unpredictable) and Foreperiod (1, 1.5, 2, 2.5, 3 s). Significant  
573 interactions were followed-up by trend analysis testing for linear and quadratic trends. The  
574 assumption of sphericity was tested, when applicable, using Mauchly's test. When Mauchly's  
575 test was significant ( $p < 0.05$ ) the Greenhouse-Geisser corrected  $p$  values are reported, along  
576 with the original degrees of freedom and the epsilon value. All statistical tests performed were  
577 two-tailed.

578

579

## 580 **Experiment 2**

### 581 *Subjects*

582 Twenty-two students of Tel Aviv University participated in Experiment 2. Two participants  
583 were excluded from the experiment due to ceiling performance on the task (more than 2 blocks  
584 with 100% accuracy). Consequently, eye tracking and behavioral analysis were based on a total  
585 of 20 participants (13 females; mean age  $24.9 \pm 4.37$ ). All participants reported normal  
586 (uncorrected) vision and audition and no history of neurological disorders. All were naïve to  
587 the purpose of this study. The ethical committees of Tel Aviv University and the School of  
588 Psychological Sciences approved the study. All participants signed an informed consent.

### 589 *Stimuli*

590 As described in Experiment 1.

### 591 *Procedure*

592 The procedure was the same as in Experiment 1, except that in the predictable blocks the  
593 majority of trials (80%) included a foreperiod of 1 s and only a minority (20%) included a  
594 foreperiod of 2.2 s. The unpredictable blocks were identical to those of Experiment 1  
595 (foreperiods 1-3 s in 0.5 s steps with equal probabilities). The experimental session was divided  
596 into 6 blocks (3 predictable blocks and 3 unpredictable) of 80 trials

### 597 *Eye tracking acquisition and analysis*



598 Analysis in this experiment focused on the 1 s intervals following the cue, which was the only  
599 predictable foreperiod used in this experiment. Consequently, in the behavioral analysis only  
600 trials with foreperiod 1 s were included. In the eye tracking analysis, we collapsed the data  
601 across all the unpredictable foreperiods and analyzed the 1 s interval following the cue. The  
602 dependent variables were, therefore, the mean saccade rate at 900-1000 ms and blink rate at  
603 500-1000 ms following cue onsets regardless of actual foreperiod duration.

604 As in Experiment 1, most saccades were smaller than 1° (mean 89.4%, SD 12.9%).

605

## 606 **Data Availability**

607 The data supporting the findings of this study, all custom scripts and the source code for  
608 Figures 2-8 have been made available at the open science framework with the identifier:

609 DOI 10.17605/OSF.IO/S8YNQ

610 Code availability

611 The custom code used in the analysis is available at the open science framework with the  
612 identifier:

613 DOI 10.17605/OSF.IO/S8YNQ

614

## 615 **References**

- 616 1. Nobre, A. C. & Van Ede, F. Anticipated moments: Temporal structure in attention.  
617 *Nature Reviews Neuroscience* **19**, 34–48 (2018).
- 618 2. Dankner, Y., Shalev, L., Carrasco, M. & Yuval-Greenberg, S. Prestimulus Inhibition of  
619 Saccades in Adults With and Without Attention-Deficit/Hyperactivity Disorder as an  
620 Index of Temporal Expectations. *Psychol. Sci.* **28**, 835–850 (2017).
- 621 3. Amit, R., Abeles, D., Carrasco, M. & Yuval-Greenberg, S. Oculomotor inhibition  
622 reflects temporal expectations. *Neuroimage* **184**, 279–292 (2019).
- 623 4. Denison, R. N., Yuval-Greenberg, S. & Carrasco, M. Directing voluntary temporal  
624 attention increases fixational stability. *J. Neurosci.* (2018). doi:10.1101/449264
- 625 5. Rolfs, M., Kliegl, R. & Engbert, R. Toward a model of microsaccade generation: The



- 626 case of microsaccadic inhibition. *J. Vis.* **8**, 5–5 (2008).
- 627 6. Yuval-Greenberg, S. & Deouell, L. Y. Scalp-recorded induced gamma-band responses  
628 to auditory stimulation and its correlations with saccadic muscle-activity. *Brain*  
629 *Topogr.* **24**, 30–39 (2010).
- 630 7. Rolfs, M., Engbert, R. & Kliegl, R. Crossmodal coupling of oculomotor control and  
631 spatial attention in vision and audition. *Exp. Brain Res.* **166**, 427–439 (2005).
- 632 8. Ehrlichman, H., Micic, D., Sousa, A. & Zhu, J. Looking for answers: Eye movements in  
633 non-visual cognitive tasks. *Brain Cogn.* **64**, 7–20 (2007).
- 634 9. Glenberg, A. M., Schroeder, J. L. & Robertson, D. A. Averting the gaze disengages the  
635 environment and facilitates remembering. *Mem. Cognit.* **26**, 651–658 (1998).
- 636 10. Abeles, D. & Yuval-Greenberg, S. Just look away: Gaze aversions as an overt  
637 attentional disengagement mechanism. *Cognition* **168**, 99–109 (2017).
- 638 11. Siegenthaler, E. *et al.* Task difficulty in mental arithmetic affects microsaccadic rates  
639 and magnitudes. *Eur. J. Neurosci.* **39**, 287–294 (2014).
- 640 12. Niemi, P. & Näätänen, R. Foreperiod and simple reaction time. *Psychol. Bull.* **89**, 133–  
641 162 (1981).
- 642 13. Cousineau, D. Confidence intervals in within-subject designs: A simpler solution to  
643 Loftus and Masson’s method. *Tutor. Quant. Methods Psychol.* **1**, 42–45 (2005).
- 644 14. Correa, Á., Lupiáñez, J., Milliken, B. & Tudela, P. Endogenous temporal orienting of  
645 attention in detection and discrimination tasks. *Percept. Psychophys.* **66**, 264–278  
646 (2004).
- 647 15. Vangkilde, S., Coull, J. T. & Bundesen, C. Great expectations: Temporal expectation  
648 modulates perceptual processing speed. *J. Exp. Psychol. Hum. Percept. Perform.* **38**,  
649 1183–1191 (2012).
- 650 16. Rohenkohl, G. & Nobre, A. C. Alpha Oscillations Related to Anticipatory Attention  
651 Follow Temporal Expectations. *J. Neurosci.* **31**, 14076–14084 (2011).
- 652 17. Menciloglu, M., Grabowecky, M. & Suzuki, S. Comparing the effects of implicit and  
653 explicit temporal expectation on choice response time and response conflict.

- 654            *Attention, Perception, Psychophys.* **79**, 169–179 (2017).
- 655    18.    Abeles, D., Amit, R. & Yuval-Greenberg, S. Oculomotor behavior during non-visual  
656            tasks: The role of visual saliency. *PLoS One* **13**, (2018).
- 657    19.    Teichner, W. H. Recent studies of simple reaction time. *Psychol. Bull.* **51**, 128–149  
658            (1954).
- 659    20.    Coull, J. T. & Nobre, A. C. Where and when to pay attention: The neural systems for  
660            directing attention to spatial locations and to time intervals as revealed by both PET  
661            and fMRI. *J. Neurosci.* **18**, 7426–7435 (1998).
- 662    21.    Zuber, B. L. & Stark, L. Saccadic suppression: elevation of visual threshold associated  
663            with saccadic eye movements. *Exp. Neurol.* **16**, 65–79 (1966).
- 664    22.    Martinez-Conde, S., Otero-Millan, J. & Macknik, S. L. The impact of microsaccades on  
665            vision: towards a unified theory of saccadic function. *Nat. Rev. Neurosci.* **14**, 83–96  
666            (2013).
- 667    23.    Volkman, F. C., Riggs, L. A. & Moore, R. K. Eyeblinks and visual suppression. *Science*  
668            (80-. ). **207**, 900–902 (1980).
- 669    24.    Volkman, F. C., Schick, A. M. L. & Riggs, L. a. Time Course of Visual Inhibition during  
670            Voluntary Saccades. *J. Opt. Soc. Am.* **58**, 562 (1968).
- 671    25.    Harris, R. L. & Lieberma, L. Auditory stimulus detection is not suppressed during  
672            saccadic eye movements. *Perception* **25**, 999–1004 (1996).
- 673    26.    Lange, K. & Röder, B. Orienting attention to points in time improves stimulus  
674            processing both within and across modalities. *J. Cogn. Neurosci.* **18**, 715–729 (2006).
- 675    27.    Miller, J. E., Carlson, L. A. & McAuley, J. D. When What You Hear Influences When You  
676            See: Listening to an Auditory Rhythm Influences the Temporal Allocation of Visual  
677            Attention. *Psychol. Sci.* **24**, 11–18 (2013).
- 678    28.    Bolger, D., Trost, W. & Schön, D. Rhythm implicitly affects temporal orienting of  
679            attention across modalities. *Acta Psychol. (Amst)*. **142**, 238–244 (2013).
- 680    29.    Jaramillo, S. & Zador, A. M. The auditory cortex mediates the perceptual effects of  
681            acoustic temporal expectation. *Nat. Neurosci.* **14**, 246–253 (2011).

- 682 30. Naatanen, R. & Niemi, P. Foreperiod and simple reaction time. *Psychol. Bull.* **89**, 133–  
683 162 (1981).
- 684 31. Elliott, R. Simple reaction time: Effects associated with age, preparatory interval,  
685 incentive-shift, and mode of presentation. *J. Exp. Child Psychol.* **9**, 86–107 (1970).
- 686 32. Klemmer, E. T. Simple reaction time as a function of time uncertainty. *J. Exp. Psychol.*  
687 **54**, 195–200 (1957).
- 688 33. Los, S. A. & Heuvel, C. E. V. D. H. Intentional and Unintentional Contributions to  
689 Nonspecific Preparation During Reaction Time Foreperiods. *J. Exp. Psychol. Hum.*  
690 *Percept. Perform.* **27**, 370–386 (2001).
- 691 34. Los, S. A., Knol, D. L. & Boers, R. M. The foreperiod effect revisited: Conditioning as a  
692 basis for nonspecific preparation. *Acta Psychol. (Amst)*. **106**, 121–145 (2001).
- 693 35. Nobre, A., Correa, A. & Coull, J. The hazards of time. *Curr. Opin. Neurobiol.* **17**, 465–  
694 470 (2007).
- 695 36. Vallesi, A., Shallice, T. & Walsh, V. Role of the prefrontal cortex in the foreperiod  
696 effect: TMS evidence for dual mechanisms in temporal preparation. *Cereb. Cortex* **17**,  
697 466–474 (2007).
- 698 37. Critchley, H. D., Mathias, C. J. & Dolan, R. J. Neural Activity in the Human Brain  
699 Relating to Uncertainty and Arousal during Anticipation. *Neuron* **29**, 537–545 (2001).
- 700 38. Coull, J. T., Cotti, J. & Vidal, F. Differential roles for parietal and frontal cortices in  
701 fixed versus evolving temporal expectations: Dissociating prior from posterior  
702 temporal probabilities with fMRI. *Neuroimage* **141**, 40–51 (2016).
- 703 39. Kim, S., Hwang, J. & Lee, D. Prefrontal Coding of Temporally Discounted Values during  
704 Intertemporal Choice. *Neuron* **59**, 161–172 (2008).
- 705 40. Rubia, K. *et al.* Prefrontal involvement in ‘temporal bridging’ and timing movement.  
706 *Neuropsychologia* **36**, 1283–1293 (1998).
- 707 41. Tsujimoto, S. & Sawaguchi, T. Neuronal Activity Representing Temporal Prediction of  
708 Reward in the Primate Prefrontal Cortex. *J. Neurophysiol.* **93**, 3687–3692 (2005).
- 709 42. Pierrot-Deseilligny, C. H., Müri, R. M., Nyffeler, T. & Milea, D. The Role of the Human

- 710 Dorsolateral Prefrontal Cortex in Ocular Motor Behavior. **1**, 239–251 (2005).
- 711 43. Johnston, K. & Everling, S. Monkey Dorsolateral Prefrontal Cortex Sends Task-  
712 Selective Signals Directly to the Superior Colliculus. **26**, 12471–12478 (2006).
- 713 44. Selemon, L. & Goldman-Rakic, P. Common cortical and subcortical targets of the  
714 dorsolateral prefrontal and posterior parietal cortices in the rhesus monkey: evidence  
715 for a distributed neural network subserving spatially guided behavior. *J. Neurosci.* **8**,  
716 4049–4068 (1998).
- 717 45. Pierrot-Deseilligny, C., Müri, R. M., Ploner, C. J., Gaymard, B. & Rivaud-Péchox, S.  
718 Cortical control of ocular saccades in humans: A model for motricity. *Prog. Brain Res.*  
719 **142**, 3–17 (2003).
- 720 46. Munoz, D. P. Commentary: Saccadic eye movements: overview of neural circuitry.  
721 *Prog. Brain Res.* **140**, (2002).
- 722 47. Hikosaka, O. GABAergic output of the basal ganglia. *Prog. Brain Res.* **160**, 209–226  
723 (2007).
- 724 48. Putnam, L. E. Great expectations: Anticipatory responses of the heart and brain. in  
725 *Event-related brain potentials: Basic issues and applications* 109–129 (Oxford  
726 University Press, 1990).
- 727 49. Breska, A. & Ivry, R. B. Double dissociation of single-interval and rhythmic temporal  
728 prediction in cerebellar degeneration and Parkinson’s disease. *Proc. Natl. Acad. Sci. U.*  
729 *S. A.* **115**, 12283–12288 (2018).
- 730 50. Woodruff-Pak, D. S., Papka, M. & Ivry, R. B. Cerebellar involvement in eyeblink  
731 classical conditioning in humans. *Neuropsychology* **10**, 443–458 (1996).
- 732 51. Mathiak, K., Hertrich, I., Zvyagintsev, M., Lutzenberger, W. & Ackermann, H. Selective  
733 influences of cross-modal spatial-cues on preattentive auditory processing: A whole-  
734 head magnetoencephalography study. *Neuroimage* **28**, 627–634 (2005).
- 735 52. Nozawa, G., Reuter-Lorenz, P. A. & Hughes, H. C. Parallel and serial processes in the  
736 human oculomotor system: bimodal integration and express saccades. *Biol. Cybern.*  
737 **72**, 19–34 (1994).
- 738

739
